# Supplementary material
Source: publisher figshare collection journal article supplement (https://diabetesjournals.figshare.com/articles/dataset/_/16701832)
Supplement: Supplementary file 1 [file 1]

**Type 2  
diabetes**

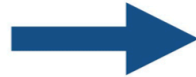

**Energetic deficiency**

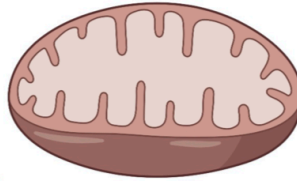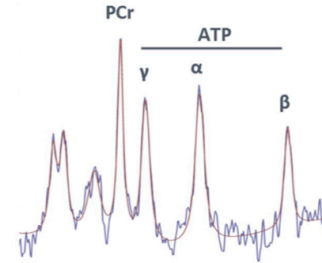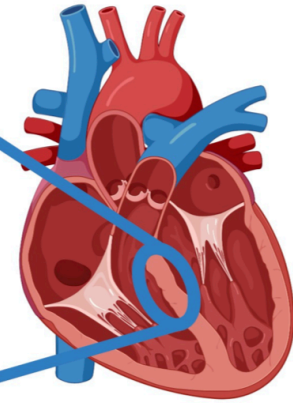

**Empagliflozin**

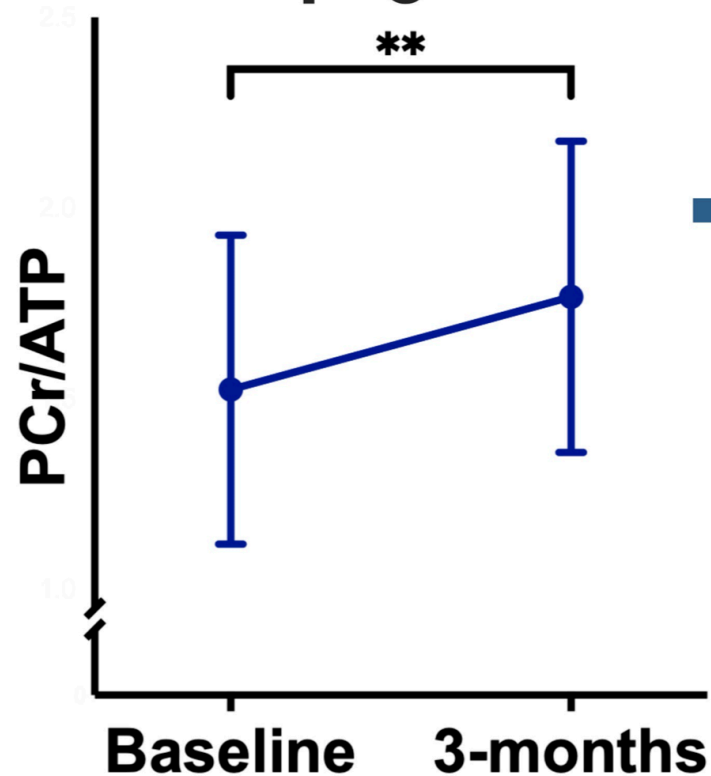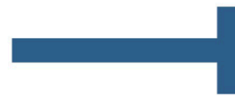

**Heart  
Failure**

- ↑ Myocardial energetics
- ↑ Left ventricular function
- ↓ Myocardial cell volume
- ↓ NT-proBNP
